# Supplementary material for: Oxygenated Ylangene-Derived Sesquiterpenoids from the Soft Coral Lemnalia philippinensis
Source: Mar Drugs. 2013 Sep 30;11(10):3735–41. doi: 10.3390/md11103735 (PMC3826132; doi:10.3390/md11103735)

## Supplementary Information

**Figure S1.**  $^1\text{H}$  NMR spectrum of **1** in  $\text{CDCl}_3$  at 500 MHz.

**Figure S2.**  $^1\text{H}$  NMR spectrum (2.4–4.0 ppm) of **1** in  $\text{CDCl}_3$  at 500 MHz.

**Figure S3.**  $^{13}\text{C}$  NMR spectrum of **1** in  $\text{CDCl}_3$  at 125 MHz.

**Figure S4.** COSY spectrum of **1** in  $\text{CDCl}_3$ .

**Figure S5.** HMBC spectrum of **1** in  $\text{CDCl}_3$ .

**Figure S6.**  $^1\text{H}$  NMR spectrum of **2** in  $\text{CDCl}_3$  at 400 MHz.

**Figure S7.**  $^{13}\text{C}$  NMR spectrum of **2** in  $\text{CDCl}_3$  at 100 MHz.

**Figure S8.** COSY spectrum of **2** in  $\text{CDCl}_3$ .

**Figure S9.** HMBC spectrum of **2** in  $\text{CDCl}_3$ .

**Figure S1.**  $^1\text{H}$  NMR spectrum of **1** in  $\text{CDCl}_3$  at 500 MHz.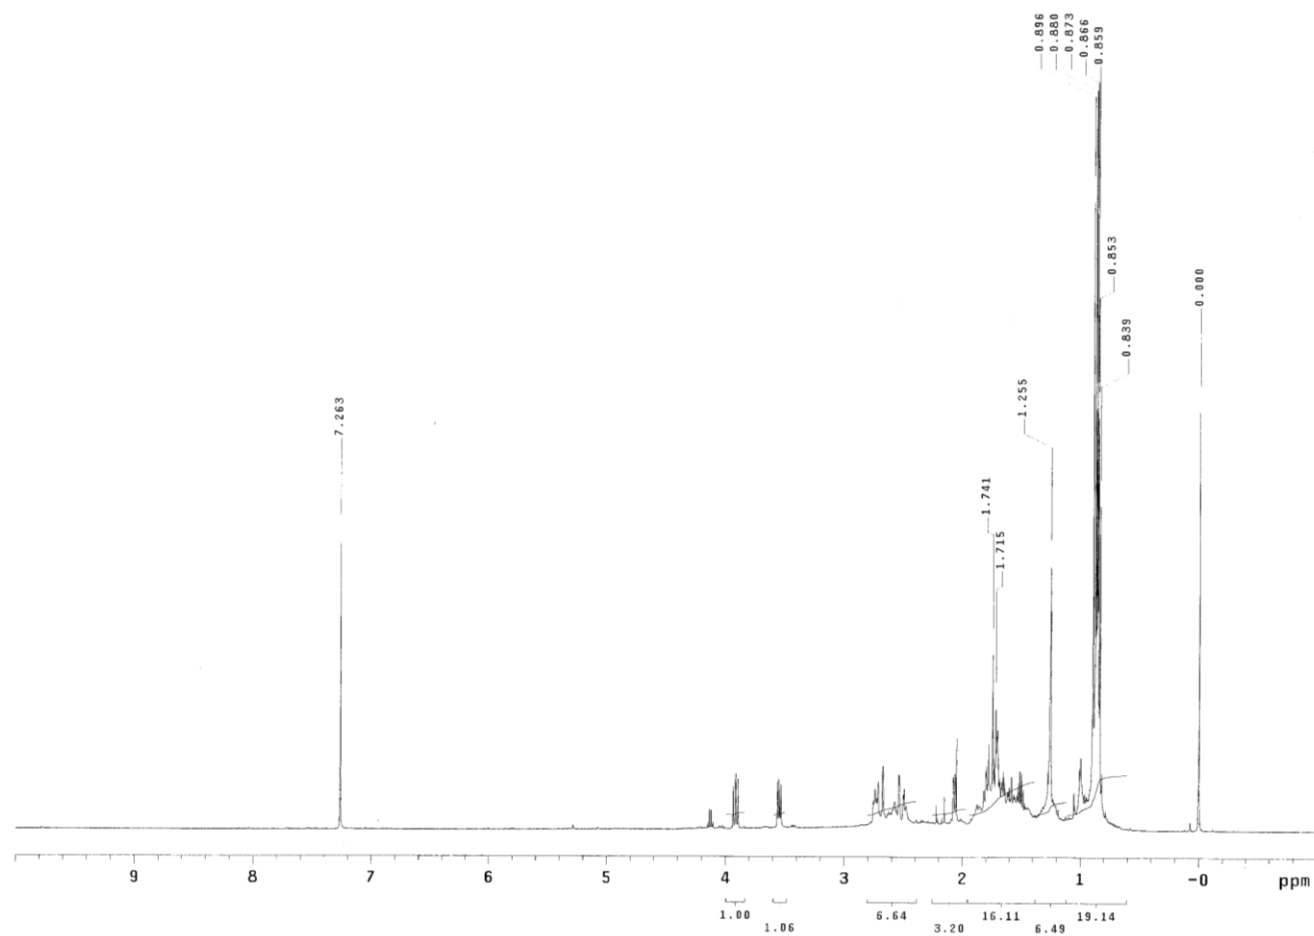

**Figure S2.**  $^1\text{H}$  NMR spectrum (2.4–4.0 ppm) of **1** in  $\text{CDCl}_3$  at 500 MHz.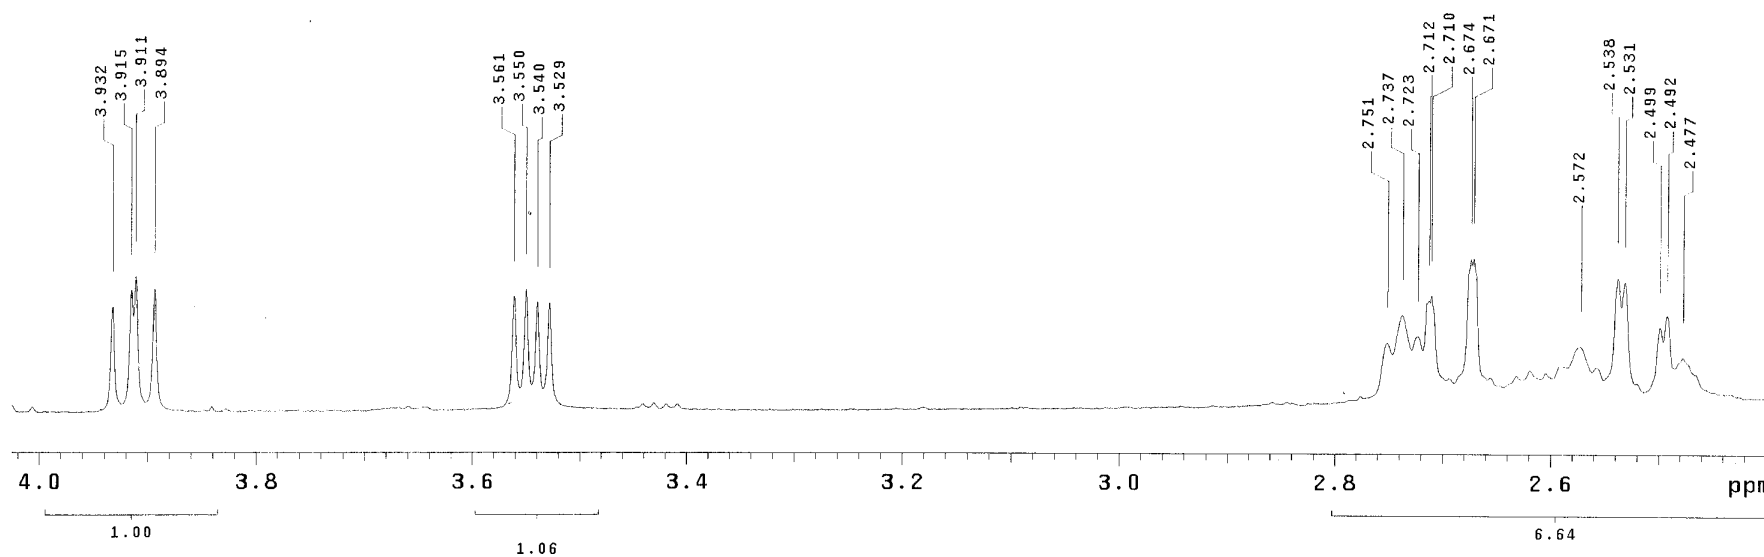

**Figure S3.**  $^{13}\text{C}$  NMR spectrum of **1** in  $\text{CDCl}_3$  at 125 MHz.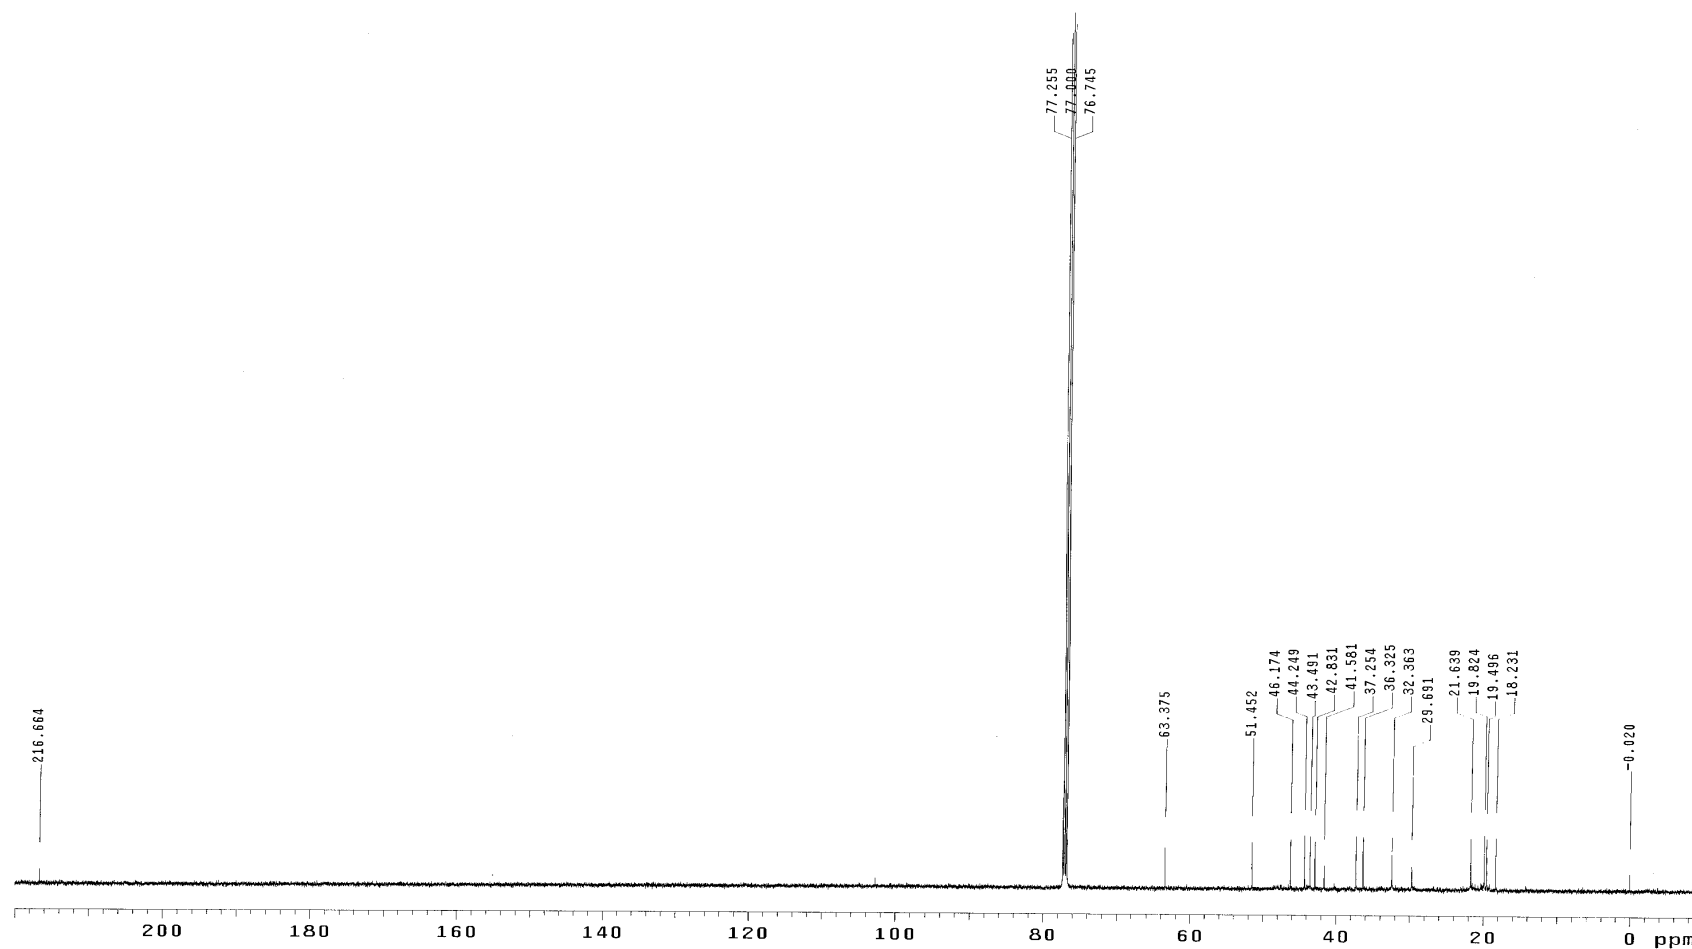

**Figure S4.** COSY spectrum of **1** in CDCl<sub>3</sub>.

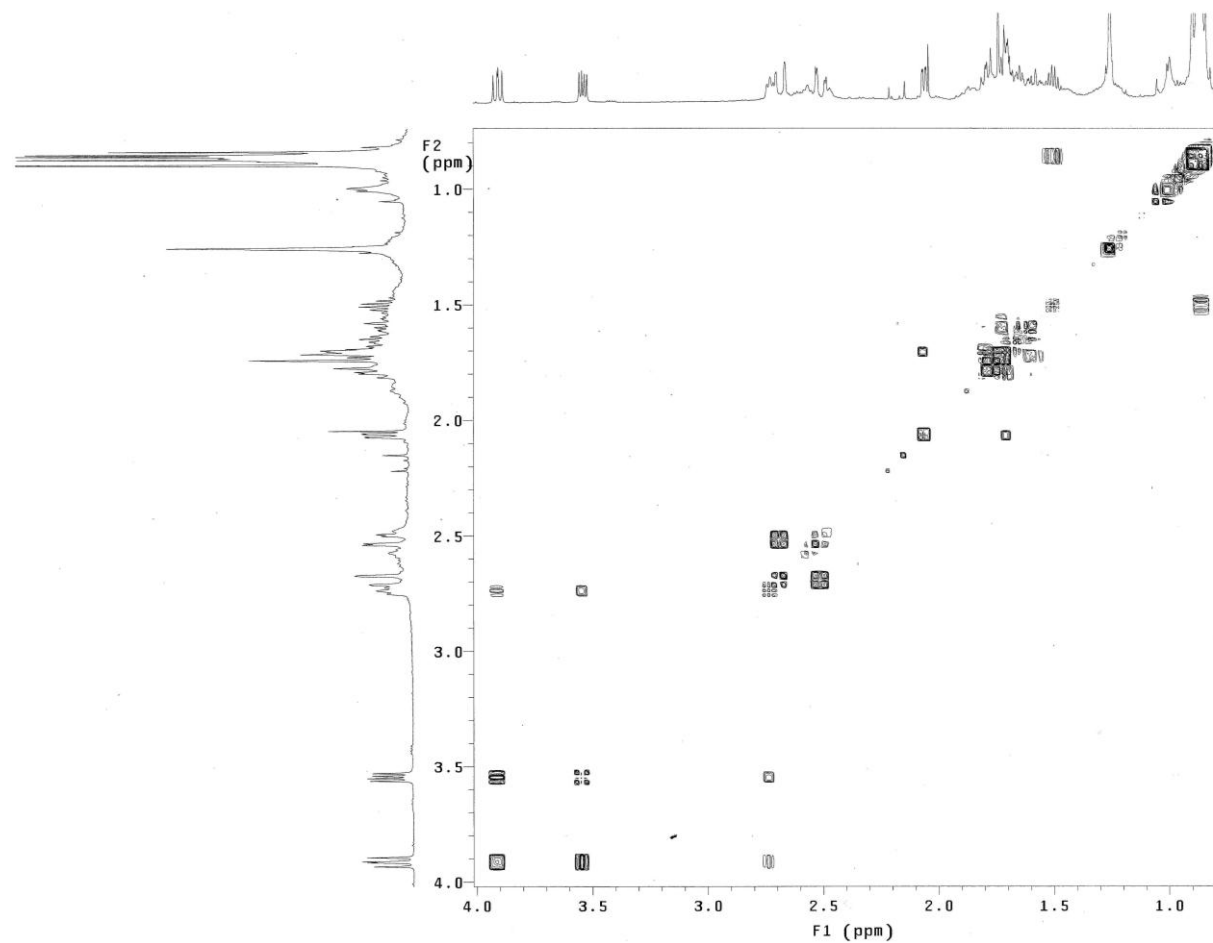

**Figure S5.** HMBC spectrum of **1** in CDCl<sub>3</sub>.

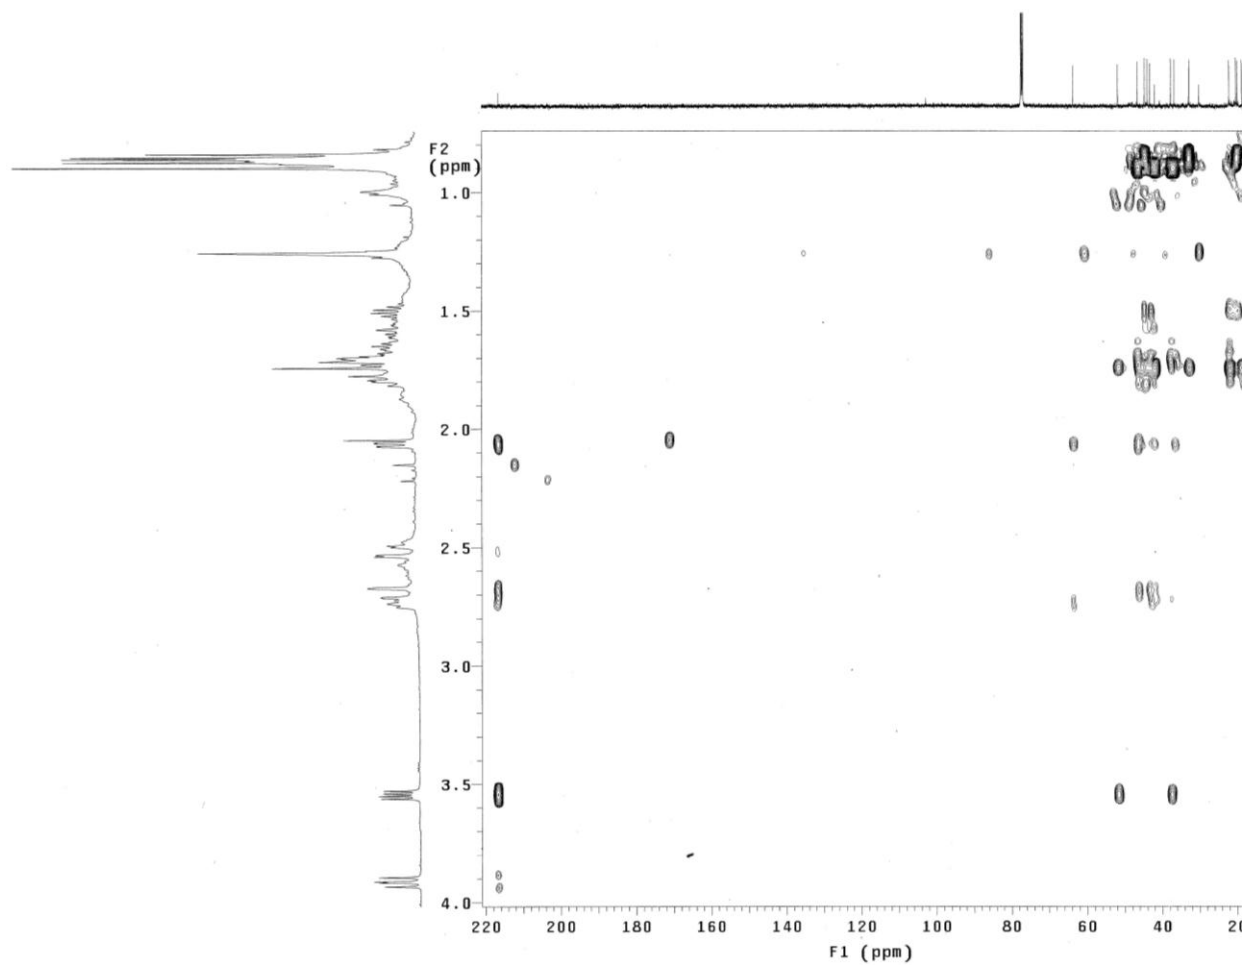

**Figure S6.**  $^1\text{H}$  NMR spectrum of **2** in  $\text{CDCl}_3$  at 400 MHz.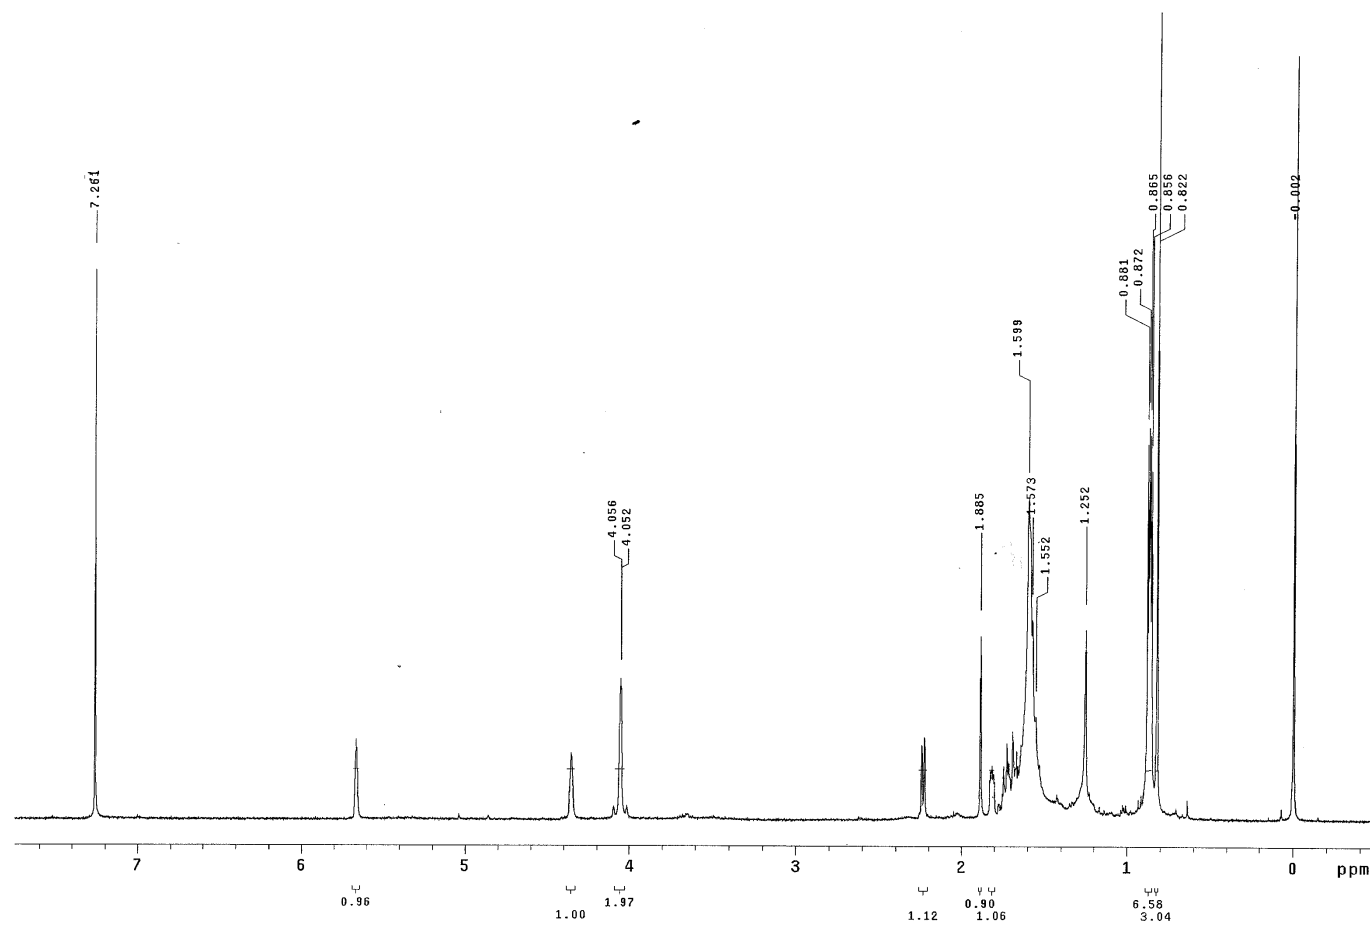

**Figure S7.**  $^{13}\text{C}$  NMR spectrum of **2** in  $\text{CDCl}_3$  at 100 MHz.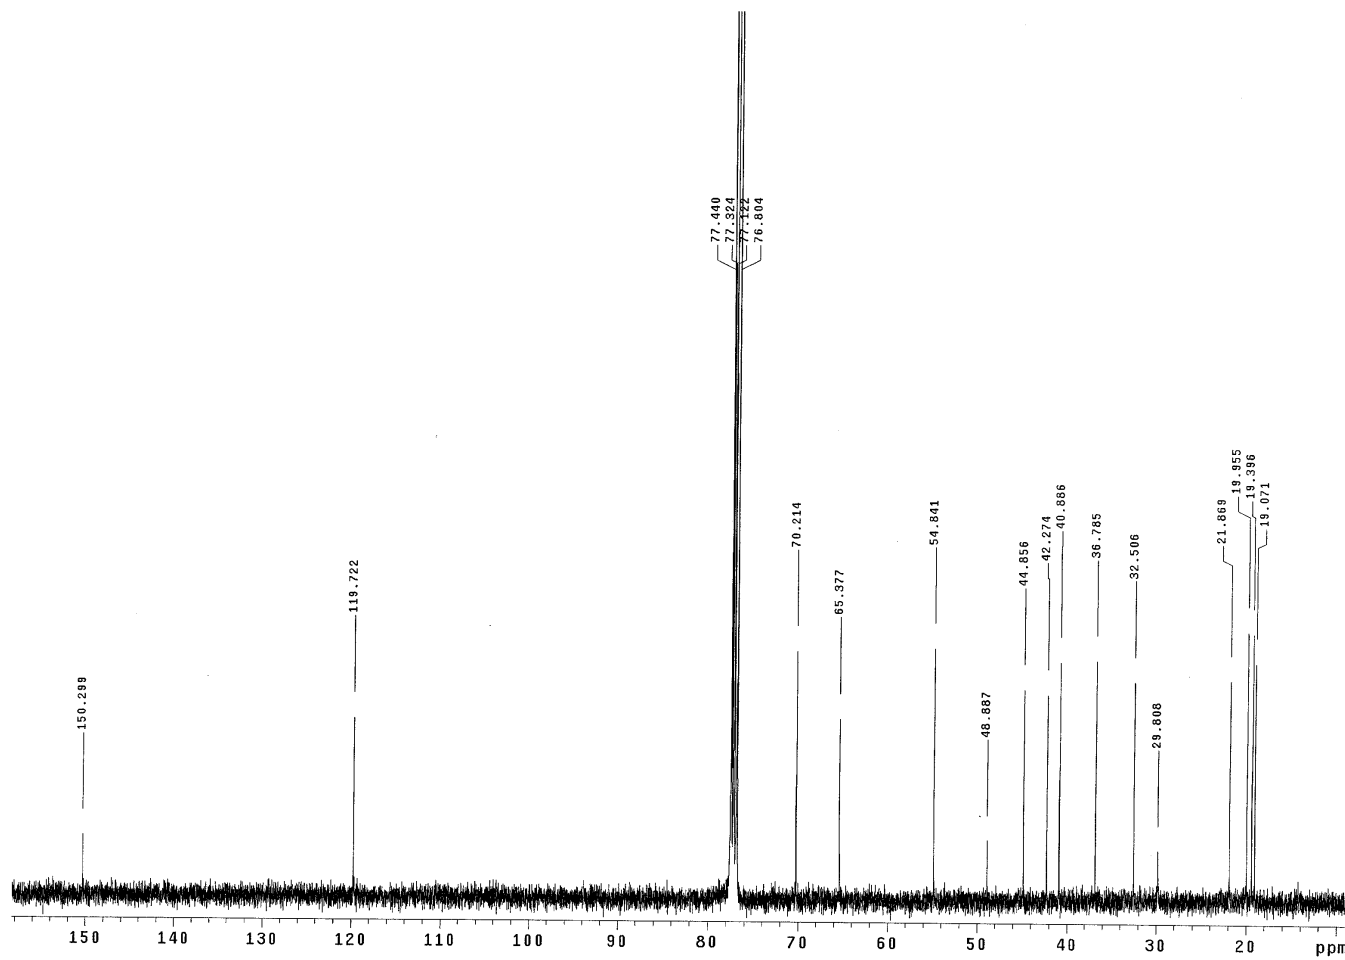

**Figure S8.** COSY spectrum of **2** in CDCl<sub>3</sub>.

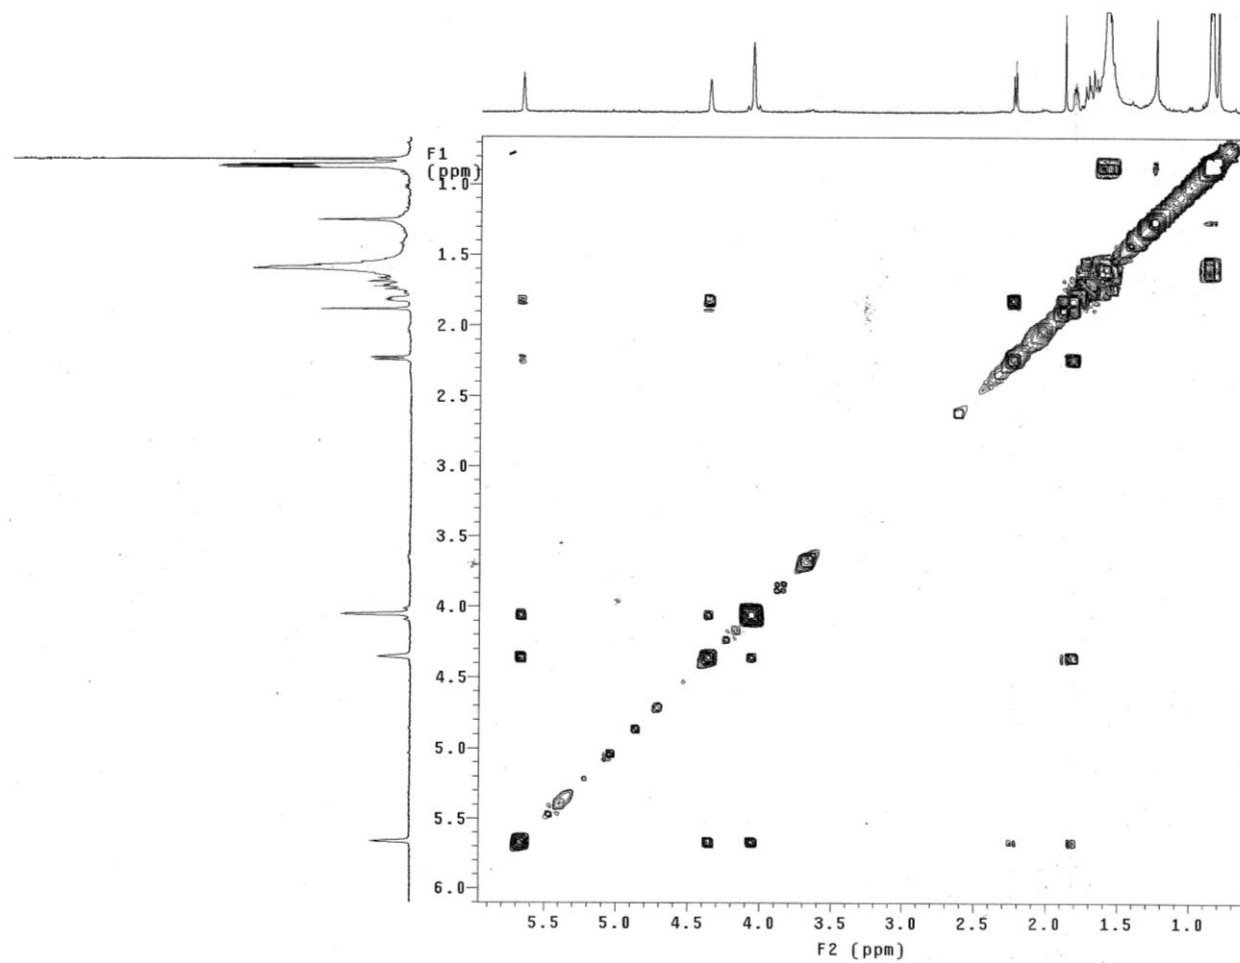

**Figure S9.** HMBC spectrum of **2** in CDCl<sub>3</sub>.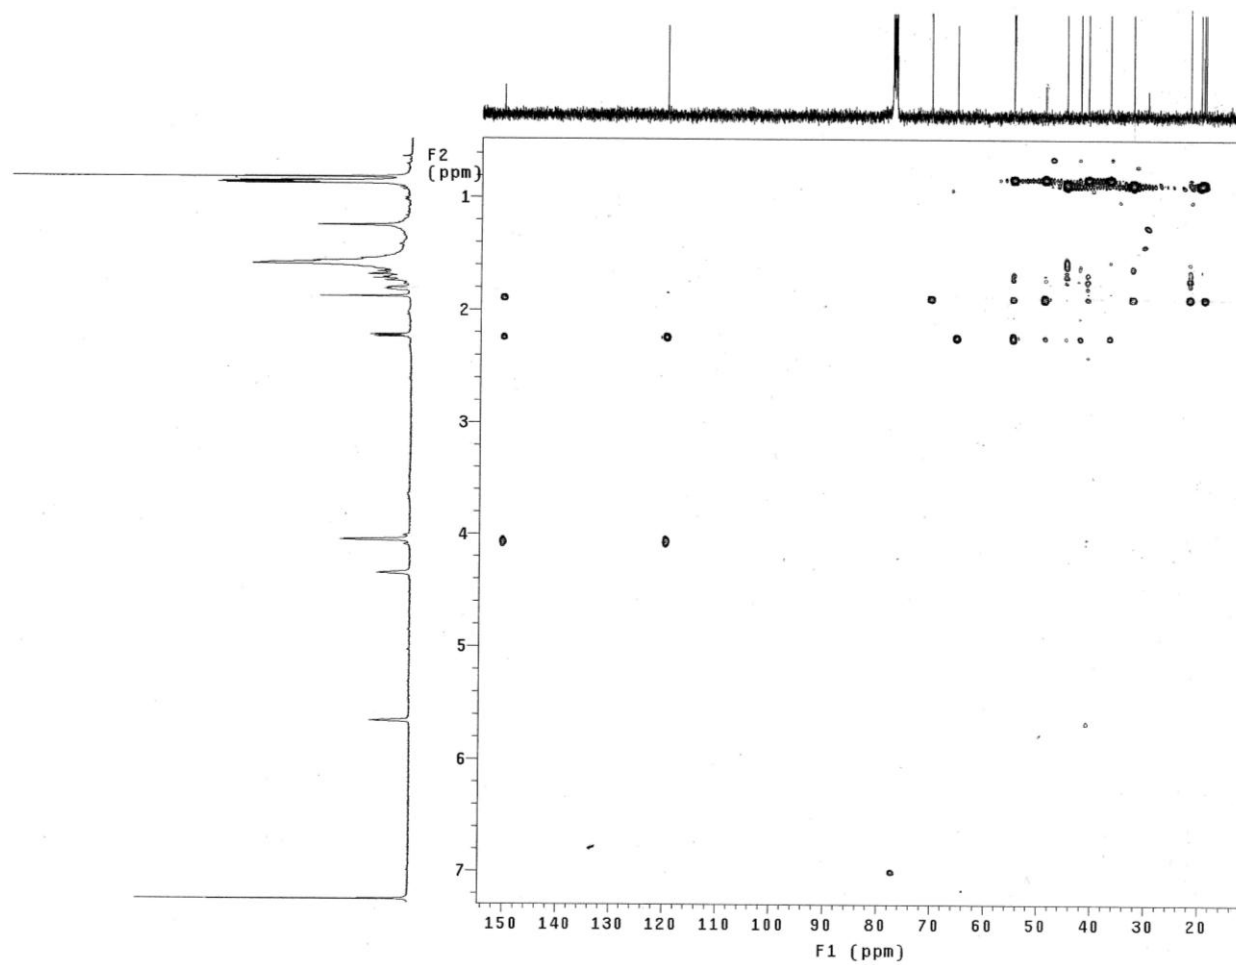

Supplement: Supplementary File 1 — Supplementary Information (PDF, 424 KB) [file marinedrugs-11-03735-s001.pdf]
