# Supplementary material for: Oxygenated Ylangene-Derived Sesquiterpenoids from the Soft Coral Lemnalia philippinensis
Source: Mar Drugs. 2013 Sep 30;11(10):3735–41. doi: 10.3390/md11103735 (PMC3826132; doi:10.3390/md11103735)
Supplement: Supplementary File 2 — 3D structure (MOL, 2 KB) [file marinedrugs-11-03735-s002.mol]

marinedrugs-11-03735-s003.mol
  ChemDraw10311314042D

 18 20  0  0  0  0  0  0  0  0999 V2000
   -0.9326    0.6127    0.0000 C   0  0  0  0  0  0  0  0  0  0  0  0
   -0.3031   -0.4776    0.0000 C   0  0  0  0  0  0  0  0  0  0  0  0
    0.4056   -0.1687    0.0000 C   0  0  0  0  0  0  0  0  0  0  0  0
    0.3264    0.6127    0.0000 C   0  0  0  0  0  0  0  0  0  0  0  0
   -0.3031    0.9762    0.0000 C   0  0  0  0  0  0  0  0  0  0  0  0
    0.1693    0.0312    0.0000 C   0  0  0  0  0  0  0  0  0  0  0  0
    1.0599    0.0856    0.0000 C   0  0  0  0  0  0  0  0  0  0  0  0
    0.9937   -0.3492    0.0000 C   0  0  0  0  0  0  0  0  0  0  0  0
    1.4474   -0.1635    0.0000 C   0  0  0  0  0  0  0  0  0  0  0  0
    2.1138   -0.1687    0.0000 O   0  0  0  0  0  0  0  0  0  0  0  0
    1.2784    0.7601    0.0000 C   0  0  0  0  0  0  0  0  0  0  0  0
    0.6899    1.2421    0.0000 C   0  0  0  0  0  0  0  0  0  0  0  0
    1.9080    1.0689    0.0000 O   0  0  0  0  0  0  0  0  0  0  0  0
   -0.8665   -0.1324    0.0000 C   0  0  0  0  0  0  0  0  0  0  0  0
   -1.4843   -0.5152    0.0000 C   0  0  0  0  0  0  0  0  0  0  0  0
   -1.4843   -1.2421    0.0000 C   0  0  0  0  0  0  0  0  0  0  0  0
   -2.1138   -0.1518    0.0000 C   0  0  0  0  0  0  0  0  0  0  0  0
   -0.4602    0.3946    0.0000 H   0  0  0  0  0  0  0  0  0  0  0  0
  2  3  1  0      
  4  5  1  0      
  5  1  1  0      
  2  6  1  0      
  6  4  1  0      
  6  7  1  0      
  3  8  1  0      
  8  9  1  0      
  7  9  1  0      
  9 10  2  0      
  7 11  1  6      
  4 12  1  0      
 11 13  1  0      
 14  1  1  0      
 14  2  1  0      
 14 15  1  6      
 15 16  1  0      
 15 17  1  0      
  6 18  1  6      
  4  3  1  0      
M  END
