# Supplementary material for: Oxygenated Ylangene-Derived Sesquiterpenoids from the Soft Coral Lemnalia philippinensis
Source: Mar Drugs. 2013 Sep 30;11(10):3735–41. doi: 10.3390/md11103735 (PMC3826132; doi:10.3390/md11103735)
Supplement: Supplementary File 3 — MOL-Document (MOL, 2 KB) [file marinedrugs-11-03735-s002-mod.mol]

marinedrugs-11-03735-s003.mol
  corina  11121305373D 1   1.00000     0.00000 
CORINA 3.49 0023  12.04.2013
 18 20  0  0  0  0  0  0  0  0999 V2000
   -0.0333    1.6194    0.2209 C   0  0  0  0  0  0  0  0  0  0  0  0
    2.3132    1.1659    0.9141 C   0  0  0  0  0  0  0  0  0  0  0  0
    2.4022   -0.2747    0.3757 C   0  0  0  0  0  0  0  0  0  0  0  0
    1.0282   -0.4749    1.0470 C   0  0  0  0  0  0  0  0  0  0  0  0
   -0.1059    0.0864    0.1722 C   0  0  0  0  0  0  0  0  0  0  0  0
    1.4961    0.5730    2.0809 C   0  0  0  0  0  0  0  0  0  0  0  0
    2.3980   -0.0515    3.1570 C   0  0  0  0  0  0  0  0  0  0  0  0
    3.5039   -1.0866    1.0754 C   0  0  0  0  0  0  0  0  0  0  0  0
    3.0758   -1.2565    2.5245 C   0  0  0  0  0  0  0  0  0  0  0  0
    3.2626   -2.2822    3.1338 O   0  0  0  0  0  0  0  0  0  0  0  0
    3.4510    0.9626    3.6084 C   0  0  0  0  0  0  0  0  0  0  0  0
    0.7502   -1.8694    1.6117 C   0  0  0  0  0  0  0  0  0  0  0  0
    4.2086    0.4138    4.6886 O   0  0  0  0  0  0  0  0  0  0  0  0
    1.4276    2.0449    0.0138 C   0  0  0  0  0  0  0  0  0  0  0  0
    1.5972    3.5156    0.3998 C   0  0  0  0  0  0  0  0  0  0  0  0
    3.0544    3.9329    0.1913 C   0  0  0  0  0  0  0  0  0  0  0  0
    0.6887    4.3808   -0.4759 C   0  0  0  0  0  0  0  0  0  0  0  0
    0.7099    1.2207    2.4688 H   0  0  0  0  0  0  0  0  0  0  0  0
  2  3  1  0      
  4  5  1  0      
  5  1  1  0      
  2  6  1  0      
  6  4  1  0      
  6  7  1  0      
  3  8  1  0      
  8  9  1  0      
  7  9  1  0      
  9 10  2  0      
  7 11  1  0      
  4 12  1  0      
 11 13  1  0      
 14  1  1  0      
 14  2  1  0      
 14 15  1  0      
 15 16  1  0      
 15 17  1  0      
  6 18  1  0      
  4  3  1  0      
M  END
$$$$
