# Supplementary material for: Oxygenated Ylangene-Derived Sesquiterpenoids from the Soft Coral Lemnalia philippinensis
Source: Mar Drugs. 2013 Sep 30;11(10):3735–41. doi: 10.3390/md11103735 (PMC3826132; doi:10.3390/md11103735)
Supplement: Supplementary File 4 — 3D structure (MOL, 2 KB) [file marinedrugs-11-03735-s003.mol]

marinedrugs-11-03735-s004.mol
  ChemDraw10311314052D

 18 20  0  0  0  0  0  0  0  0999 V2000
   -0.7984    0.6045    0.0000 C   0  0  0  0  0  0  0  0  0  0  0  0
   -0.1773   -0.4712    0.0000 C   0  0  0  0  0  0  0  0  0  0  0  0
    0.5219   -0.1665    0.0000 C   0  0  0  0  0  0  0  0  0  0  0  0
    0.4438    0.6045    0.0000 C   0  0  0  0  0  0  0  0  0  0  0  0
   -0.1773    0.9631    0.0000 C   0  0  0  0  0  0  0  0  0  0  0  0
    0.2888    0.0308    0.0000 C   0  0  0  0  0  0  0  0  0  0  0  0
    1.1674    0.0845    0.0000 C   0  0  0  0  0  0  0  0  0  0  0  0
    1.0044   -0.3392    0.0000 C   0  0  0  0  0  0  0  0  0  0  0  0
    1.5605   -0.1680    0.0000 C   0  0  0  0  0  0  0  0  0  0  0  0
    1.3830    0.7499    0.0000 C   0  0  0  0  0  0  0  0  0  0  0  0
    0.8024    1.2255    0.0000 C   0  0  0  0  0  0  0  0  0  0  0  0
    2.0042    1.0546    0.0000 O   0  0  0  0  0  0  0  0  0  0  0  0
   -0.7331   -0.1306    0.0000 C   0  0  0  0  0  0  0  0  0  0  0  0
   -1.3427   -0.5083    0.0000 C   0  0  0  0  0  0  0  0  0  0  0  0
   -1.3427   -1.2255    0.0000 C   0  0  0  0  0  0  0  0  0  0  0  0
   -2.0042   -0.2393    0.0000 C   0  0  0  0  0  0  0  0  0  0  0  0
   -0.3322    0.3893    0.0000 H   0  0  0  0  0  0  0  0  0  0  0  0
    1.1151   -1.1966    0.0000 O   0  0  0  0  0  0  0  0  0  0  0  0
  2  3  1  0      
  4  5  1  0      
  5  1  1  0      
  2  6  1  0      
  6  4  1  0      
  6  7  1  0      
  3  8  1  0      
  8  9  1  0      
  4 11  1  0      
 10 12  1  0      
 13  1  1  0      
 13  2  1  0      
 13 14  1  6      
 14 15  1  0      
 14 16  1  0      
  7  9  2  0      
  8 18  1  6      
  7 10  1  0      
  6 17  1  6      
  4  3  1  0      
M  END
