# Supplementary material for: Oxygenated Ylangene-Derived Sesquiterpenoids from the Soft Coral Lemnalia philippinensis
Source: Mar Drugs. 2013 Sep 30;11(10):3735–41. doi: 10.3390/md11103735 (PMC3826132; doi:10.3390/md11103735)
Supplement: Supplementary File 5 — MOL-Document (MOL, 2 KB) [file marinedrugs-11-03735-s003-mod.mol]

marinedrugs-11-03735-s004.mol
  corina  11121305373D 1   1.00000     0.00000 
CORINA 3.49 0023  12.04.2013
 18 20  0  0  0  0  0  0  0  0999 V2000
   -0.0187    1.5312    0.0105 C   0  0  0  0  0  0  0  0  0  0  0  0
    2.2220    1.2337    1.0499 C   0  0  0  0  0  0  0  0  0  0  0  0
    2.4704   -0.2218    0.6057 C   0  0  0  0  0  0  0  0  0  0  0  0
    1.0201   -0.4800    1.0468 C   0  0  0  0  0  0  0  0  0  0  0  0
    0.0021   -0.0041    0.0020 C   0  0  0  0  0  0  0  0  0  0  0  0
    1.2914    0.6134    2.1114 C   0  0  0  0  0  0  0  0  0  0  0  0
    2.0778    0.0034    3.2556 C   0  0  0  0  0  0  0  0  0  0  0  0
    3.5074   -0.9069    1.5029 C   0  0  0  0  0  0  0  0  0  0  0  0
    3.1295   -0.7224    2.9527 C   0  0  0  0  0  0  0  0  0  0  0  0
    1.6675    0.2227    4.6890 C   0  0  0  0  0  0  0  0  0  0  0  0
    0.7298   -1.8737    1.6075 C   0  0  0  0  0  0  0  0  0  0  0  0
    2.5766   -0.4601    5.5545 O   0  0  0  0  0  0  0  0  0  0  0  0
    1.4342    2.0283   -0.0007 C   0  0  0  0  0  0  0  0  0  0  0  0
    1.4725    3.5185    0.3438 C   0  0  0  0  0  0  0  0  0  0  0  0
    2.9220    4.0078    0.3311 C   0  0  0  0  0  0  0  0  0  0  0  0
    0.6607    4.3018   -0.6898 C   0  0  0  0  0  0  0  0  0  0  0  0
    0.4345    1.2186    2.4073 H   0  0  0  0  0  0  0  0  0  0  0  0
    4.7934   -0.3289    1.2697 O   0  0  0  0  0  0  0  0  0  0  0  0
  2  3  1  0      
  4  5  1  0      
  5  1  1  0      
  2  6  1  0      
  6  4  1  0      
  6  7  1  0      
  3  8  1  0      
  8  9  1  0      
  4 11  1  0      
 10 12  1  0      
 13  1  1  0      
 13  2  1  0      
 13 14  1  0      
 14 15  1  0      
 14 16  1  0      
  7  9  2  0      
  8 18  1  0      
  7 10  1  0      
  6 17  1  0      
  4  3  1  0      
M  END
$$$$
