# Supplementary material for: Oxygenated Ylangene-Derived Sesquiterpenoids from the Soft Coral Lemnalia philippinensis
Source: Mar Drugs. 2013 Sep 30;11(10):3735–41. doi: 10.3390/md11103735 (PMC3826132; doi:10.3390/md11103735)
Supplement: Supplementary File 6 — 3D structure (MOL, 2 KB) [file marinedrugs-11-03735-s004.mol]

marinedrugs-11-03735-s005.mol
  ChemDraw10311314062D

 17 19  0  0  0  0  0  0  0  0999 V2000
   -0.4469    0.6226    0.0000 C   0  0  0  0  0  0  0  0  0  0  0  0
    0.1928   -0.4853    0.0000 C   0  0  0  0  0  0  0  0  0  0  0  0
    0.9129   -0.1714    0.0000 C   0  0  0  0  0  0  0  0  0  0  0  0
    0.8324    0.6226    0.0000 C   0  0  0  0  0  0  0  0  0  0  0  0
    0.1928    0.9919    0.0000 C   0  0  0  0  0  0  0  0  0  0  0  0
    0.6728    0.0317    0.0000 C   0  0  0  0  0  0  0  0  0  0  0  0
    1.5777    0.0870    0.0000 C   0  0  0  0  0  0  0  0  0  0  0  0
    1.4662   -0.3313    0.0000 C   0  0  0  0  0  0  0  0  0  0  0  0
    1.8692   -0.1745    0.0000 C   0  0  0  0  0  0  0  0  0  0  0  0
    1.2018    1.2622    0.0000 C   0  0  0  0  0  0  0  0  0  0  0  0
   -0.3797   -0.1346    0.0000 C   0  0  0  0  0  0  0  0  0  0  0  0
   -1.0075   -0.5235    0.0000 C   0  0  0  0  0  0  0  0  0  0  0  0
   -1.0075   -1.2622    0.0000 C   0  0  0  0  0  0  0  0  0  0  0  0
   -1.8692   -0.0703    0.0000 C   0  0  0  0  0  0  0  0  0  0  0  0
    0.0332    0.4010    0.0000 H   0  0  0  0  0  0  0  0  0  0  0  0
    1.8095    0.9522    0.0000 C   0  0  0  0  0  0  0  0  0  0  0  0
    1.8692   -1.0702    0.0000 O   0  0  0  0  0  0  0  0  0  0  0  0
  2  3  1  0      
  4  5  1  0      
  5  1  1  0      
  2  6  1  0      
  6  4  1  0      
  6  7  1  0      
  3  8  1  0      
  8  9  1  0      
  7  9  1  0      
  4 10  1  0      
 11  1  1  0      
 11  2  1  0      
 11 12  1  6      
 12 13  1  0      
 12 14  1  0      
  6 15  1  6      
  7 16  2  0      
  9 17  1  6      
  4  3  1  0      
M  END
