# Supplementary material for: Oxygenated Ylangene-Derived Sesquiterpenoids from the Soft Coral Lemnalia philippinensis
Source: Mar Drugs. 2013 Sep 30;11(10):3735–41. doi: 10.3390/md11103735 (PMC3826132; doi:10.3390/md11103735)
Supplement: Supplementary File 7 — MOL-Document (MOL, 2 KB) [file marinedrugs-11-03735-s004-mod.mol]

marinedrugs-11-03735-s005.mol
  corina  11121305373D 1   1.00000     0.00000 
CORINA 3.49 0023  12.04.2013
 17 19  0  0  0  0  0  0  0  0999 V2000
   -0.0106    1.7060    0.4482 C   0  0  0  0  0  0  0  0  0  0  0  0
    2.3782    1.0878    0.7673 C   0  0  0  0  0  0  0  0  0  0  0  0
    2.3017   -0.3431    0.2041 C   0  0  0  0  0  0  0  0  0  0  0  0
    1.0220   -0.4784    1.0471 C   0  0  0  0  0  0  0  0  0  0  0  0
   -0.1865    0.1827    0.3689 C   0  0  0  0  0  0  0  0  0  0  0  0
    1.7158    0.4972    2.0315 C   0  0  0  0  0  0  0  0  0  0  0  0
    2.7417   -0.2801    2.8509 C   0  0  0  0  0  0  0  0  0  0  0  0
    3.4502   -1.2277    0.6970 C   0  0  0  0  0  0  0  0  0  0  0  0
    3.2512   -1.5509    2.1856 C   0  0  0  0  0  0  0  0  0  0  0  0
    0.7346   -1.8723    1.6088 C   0  0  0  0  0  0  0  0  0  0  0  0
    1.4283    2.0446    0.0320 C   0  0  0  0  0  0  0  0  0  0  0  0
    1.7508    3.4897    0.4178 C   0  0  0  0  0  0  0  0  0  0  0  0
    3.1851    3.8209    0.0008 C   0  0  0  0  0  0  0  0  0  0  0  0
    0.7814    4.4359   -0.2934 C   0  0  0  0  0  0  0  0  0  0  0  0
    1.0657    1.1646    2.5973 H   0  0  0  0  0  0  0  0  0  0  0  0
    3.1509    0.1142    4.0312 C   0  0  0  0  0  0  0  0  0  0  0  0
    4.4949   -1.9426    2.7703 O   0  0  0  0  0  0  0  0  0  0  0  0
  2  3  1  0      
  4  5  1  0      
  5  1  1  0      
  2  6  1  0      
  6  4  1  0      
  6  7  1  0      
  3  8  1  0      
  8  9  1  0      
  7  9  1  0      
  4 10  1  0      
 11  1  1  0      
 11  2  1  0      
 11 12  1  0      
 12 13  1  0      
 12 14  1  0      
  6 15  1  0      
  7 16  2  0      
  9 17  1  0      
  4  3  1  0      
M  END
$$$$
